# Supplementary material for: Functional and Immunological Relevance of Anaplasma marginale Major Surface Protein 1a Sequence and Structural Analysis
Source: PubMed Central journal article supplement (PMC3679145; doi:10.1371/journal.pone.0065243), 2013-06-11
Supplement: pone.0065243.s001.pdf [file pone.0065243.s001.pdf]

| Strain Name                                                                   | Accession No. / Reference | Tandem repeat structure                                                                                                                                                                                                                                                                                                                   | No. Tandem repeats |          |          |          |          |         |          |          |         |         |         |    |    |    |   |
|-------------------------------------------------------------------------------|---------------------------|-------------------------------------------------------------------------------------------------------------------------------------------------------------------------------------------------------------------------------------------------------------------------------------------------------------------------------------------|--------------------|----------|----------|----------|----------|---------|----------|----------|---------|---------|---------|----|----|----|---|
| Argentina/Chaco/ - ( $\alpha$ , $\beta$ , $\Gamma^2$ , $\beta^2$ , $\Gamma$ ) | DQ833264                  | <table border="1"><tr><td><math>\alpha</math></td><td><math>\beta</math></td><td><math>\Gamma</math></td><td><math>\Gamma</math></td><td><math>\beta</math></td><td><math>\beta</math></td><td><math>\Gamma</math></td></tr><tr><td><math>\tau</math></td><td>11</td><td>10</td><td>10</td><td>11</td><td>10</td><td>15</td></tr></table> | $\alpha$           | $\beta$  | $\Gamma$ | $\Gamma$ | $\beta$  | $\beta$ | $\Gamma$ | $\tau$   | 11      | 10      | 10      | 11 | 10 | 15 | 7 |
| $\alpha$                                                                      | $\beta$                   | $\Gamma$                                                                                                                                                                                                                                                                                                                                  | $\Gamma$           | $\beta$  | $\beta$  | $\Gamma$ |          |         |          |          |         |         |         |    |    |    |   |
| $\tau$                                                                        | 11                        | 10                                                                                                                                                                                                                                                                                                                                        | 10                 | 11       | 10       | 15       |          |         |          |          |         |         |         |    |    |    |   |
| Argentina/Chaco/ - ( $\tau$ , 11, 10 <sup>2</sup> , 11, 10, 15)               | DQ833266                  | <table border="1"><tr><td><math>\tau</math></td><td>22</td><td>13</td><td>18</td><td></td><td></td><td></td></tr><tr><td>23</td><td>24</td><td>25</td><td>26</td><td>27</td><td>27</td><td></td></tr></table>                                                                                                                             | $\tau$             | 22       | 13       | 18       |          |         |          | 23       | 24      | 25      | 26      | 27 | 27 |    | 7 |
| $\tau$                                                                        | 22                        | 13                                                                                                                                                                                                                                                                                                                                        | 18                 |          |          |          |          |         |          |          |         |         |         |    |    |    |   |
| 23                                                                            | 24                        | 25                                                                                                                                                                                                                                                                                                                                        | 26                 | 27       | 27       |          |          |         |          |          |         |         |         |    |    |    |   |
| Argentina/Chaco/ - ( $\tau$ , 22, 13, 18)                                     | DQ833263                  | <table border="1"><tr><td>23</td><td>24</td><td>25</td><td>26</td><td>27</td><td>27</td><td></td></tr><tr><td>53</td><td>10</td><td>10</td><td></td><td></td><td></td><td></td></tr></table>                                                                                                                                              | 23                 | 24       | 25       | 26       | 27       | 27      |          | 53       | 10      | 10      |         |    |    |    | 4 |
| 23                                                                            | 24                        | 25                                                                                                                                                                                                                                                                                                                                        | 26                 | 27       | 27       |          |          |         |          |          |         |         |         |    |    |    |   |
| 53                                                                            | 10                        | 10                                                                                                                                                                                                                                                                                                                                        |                    |          |          |          |          |         |          |          |         |         |         |    |    |    |   |
| Argentina/Cordoba/ - (23, 24, 25, 26, 27 <sup>2</sup> )                       | DQ833261                  | <table border="1"><tr><td>53</td><td>10</td><td>10</td><td></td><td></td><td></td><td></td></tr><tr><td>48</td><td>11</td><td>10</td><td></td><td></td><td></td><td></td></tr></table>                                                                                                                                                    | 53                 | 10       | 10       |          |          |         |          | 48       | 11      | 10      |         |    |    |    | 6 |
| 53                                                                            | 10                        | 10                                                                                                                                                                                                                                                                                                                                        |                    |          |          |          |          |         |          |          |         |         |         |    |    |    |   |
| 48                                                                            | 11                        | 10                                                                                                                                                                                                                                                                                                                                        |                    |          |          |          |          |         |          |          |         |         |         |    |    |    |   |
| Argentina/Corrientes/ - (53, 10 <sup>2</sup> )                                | DQ833273                  | <table border="1"><tr><td><math>\alpha</math></td><td>49</td><td>50</td><td>51</td><td>52</td><td></td><td></td></tr><tr><td><math>\alpha</math></td><td><math>\beta</math></td><td><math>\beta</math></td><td><math>\beta</math></td><td></td><td></td><td></td></tr></table>                                                            | $\alpha$           | 49       | 50       | 51       | 52       |         |          | $\alpha$ | $\beta$ | $\beta$ | $\beta$ |    |    |    | 3 |
| $\alpha$                                                                      | 49                        | 50                                                                                                                                                                                                                                                                                                                                        | 51                 | 52       |          |          |          |         |          |          |         |         |         |    |    |    |   |
| $\alpha$                                                                      | $\beta$                   | $\beta$                                                                                                                                                                                                                                                                                                                                   | $\beta$            |          |          |          |          |         |          |          |         |         |         |    |    |    |   |
| Argentina/Corrientes/ - (48, 11, 10)                                          | DQ833274                  | <table border="1"><tr><td>F</td><td>M</td><td>M</td><td></td><td></td><td></td><td></td></tr><tr><td>23</td><td>30</td><td>31</td><td>31</td><td>31</td><td></td><td></td></tr></table>                                                                                                                                                   | F                  | M        | M        |          |          |         |          | 23       | 30      | 31      | 31      | 31 |    |    | 3 |
| F                                                                             | M                         | M                                                                                                                                                                                                                                                                                                                                         |                    |          |          |          |          |         |          |          |         |         |         |    |    |    |   |
| 23                                                                            | 30                        | 31                                                                                                                                                                                                                                                                                                                                        | 31                 | 31       |          |          |          |         |          |          |         |         |         |    |    |    |   |
| Argentina/Corrientes/ - ( $\alpha$ , 49, 50, 51, 52)                          | DQ833275                  | <table border="1"><tr><td>28</td><td>29</td><td>M</td><td>29</td><td>M</td><td>F</td><td></td></tr><tr><td>B</td><td>B</td><td>M</td><td></td><td></td><td></td><td></td></tr></table>                                                                                                                                                    | 28                 | 29       | M        | 29       | M        | F       |          | B        | B       | M       |         |    |    |    | 5 |
| 28                                                                            | 29                        | M                                                                                                                                                                                                                                                                                                                                         | 29                 | M        | F        |          |          |         |          |          |         |         |         |    |    |    |   |
| B                                                                             | B                         | M                                                                                                                                                                                                                                                                                                                                         |                    |          |          |          |          |         |          |          |         |         |         |    |    |    |   |
| Argentina/Corrientes/ - ( $\alpha$ , $\beta^3$ )                              | DQ833272                  | <table border="1"><tr><td><math>\alpha</math></td><td><math>\beta</math></td><td><math>\beta</math></td><td><math>\beta</math></td><td><math>\Gamma</math></td><td></td><td></td></tr><tr><td><math>\Sigma</math></td><td>B</td><td>Q</td><td>B</td><td>C</td><td></td><td></td></tr></table>                                             | $\alpha$           | $\beta$  | $\beta$  | $\beta$  | $\Gamma$ |         |          | $\Sigma$ | B       | Q       | B       | C  |    |    | 4 |
| $\alpha$                                                                      | $\beta$                   | $\beta$                                                                                                                                                                                                                                                                                                                                   | $\beta$            | $\Gamma$ |          |          |          |         |          |          |         |         |         |    |    |    |   |
| $\Sigma$                                                                      | B                         | Q                                                                                                                                                                                                                                                                                                                                         | B                  | C        |          |          |          |         |          |          |         |         |         |    |    |    |   |
| Argentina/Entre Rios/ - (F, M <sup>2</sup> )                                  | DQ833249                  | <table border="1"><tr><td>8</td><td></td><td></td><td></td><td></td><td></td><td></td></tr><tr><td>8</td><td></td><td></td><td></td><td></td><td></td><td></td></tr></table>                                                                                                                                                              | 8                  |          |          |          |          |         |          | 8        |         |         |         |    |    |    | 3 |
| 8                                                                             |                           |                                                                                                                                                                                                                                                                                                                                           |                    |          |          |          |          |         |          |          |         |         |         |    |    |    |   |
| 8                                                                             |                           |                                                                                                                                                                                                                                                                                                                                           |                    |          |          |          |          |         |          |          |         |         |         |    |    |    |   |
| Argentina/Mercedes/ - (23, 30, 31 <sup>3</sup> )                              | DQ833271                  | <table border="1"><tr><td>13</td><td>27</td><td>27</td><td>27</td><td></td><td></td><td></td></tr><tr><td><math>\alpha</math></td><td><math>\beta</math></td><td><math>\tau</math></td><td>M</td><td></td><td></td><td></td></tr></table>                                                                                                 | 13                 | 27       | 27       | 27       |          |         |          | $\alpha$ | $\beta$ | $\tau$  | M       |    |    |    | 5 |
| 13                                                                            | 27                        | 27                                                                                                                                                                                                                                                                                                                                        | 27                 |          |          |          |          |         |          |          |         |         |         |    |    |    |   |
| $\alpha$                                                                      | $\beta$                   | $\tau$                                                                                                                                                                                                                                                                                                                                    | M                  |          |          |          |          |         |          |          |         |         |         |    |    |    |   |
| Argentina/Quitilipi/ - (28, 29, M, 29, M, F)                                  | DQ833270                  | <table border="1"><tr><td>72</td><td>62</td><td>61</td><td></td><td></td><td></td><td></td></tr><tr><td>C</td><td>F</td><td>N</td><td></td><td></td><td></td><td></td></tr></table>                                                                                                                                                       | 72                 | 62       | 61       |          |          |         |          | C        | F       | N       |         |    |    |    | 6 |
| 72                                                                            | 62                        | 61                                                                                                                                                                                                                                                                                                                                        |                    |          |          |          |          |         |          |          |         |         |         |    |    |    |   |
| C                                                                             | F                         | N                                                                                                                                                                                                                                                                                                                                         |                    |          |          |          |          |         |          |          |         |         |         |    |    |    |   |
| Argentina/Salta/ G - (B <sup>2</sup> , M)                                     | AF428093                  | <table border="1"><tr><td>13</td><td>159</td><td>159</td><td></td><td></td><td></td><td></td></tr><tr><td>72</td><td>62</td><td>61</td><td></td><td></td><td></td><td></td></tr></table>                                                                                                                                                  | 13                 | 159      | 159      |          |          |         |          | 72       | 62      | 61      |         |    |    |    | 3 |
| 13                                                                            | 159                       | 159                                                                                                                                                                                                                                                                                                                                       |                    |          |          |          |          |         |          |          |         |         |         |    |    |    |   |
| 72                                                                            | 62                        | 61                                                                                                                                                                                                                                                                                                                                        |                    |          |          |          |          |         |          |          |         |         |         |    |    |    |   |
| Argentina/Santa Fe/ - ( $\alpha$ , $\beta^3$ , $\Gamma$ )                     | DQ833253                  | <table border="1"><tr><td>78</td><td>24</td><td>24</td><td>25</td><td>31</td><td></td><td></td></tr><tr><td><math>\alpha</math></td><td><math>\beta</math></td><td><math>\beta</math></td><td>13</td><td></td><td></td><td></td></tr></table>                                                                                             | 78                 | 24       | 24       | 25       | 31       |         |          | $\alpha$ | $\beta$ | $\beta$ | 13      |    |    |    | 5 |
| 78                                                                            | 24                        | 24                                                                                                                                                                                                                                                                                                                                        | 25                 | 31       |          |          |          |         |          |          |         |         |         |    |    |    |   |
| $\alpha$                                                                      | $\beta$                   | $\beta$                                                                                                                                                                                                                                                                                                                                   | 13                 |          |          |          |          |         |          |          |         |         |         |    |    |    |   |
| Argentina/Virasoro/E - ( $\Sigma$ , B, Q, B, C)                               | AF428094                  | <table border="1"><tr><td><math>\alpha</math></td><td><math>\beta</math></td><td><math>\beta</math></td><td><math>\beta</math></td><td><math>\Gamma</math></td><td></td><td></td></tr><tr><td><math>\Sigma</math></td><td>B</td><td>Q</td><td>B</td><td>C</td><td></td><td></td></tr></table>                                             | $\alpha$           | $\beta$  | $\beta$  | $\beta$  | $\Gamma$ |         |          | $\Sigma$ | B       | Q       | B       | C  |    |    | 5 |
| $\alpha$                                                                      | $\beta$                   | $\beta$                                                                                                                                                                                                                                                                                                                                   | $\beta$            | $\Gamma$ |          |          |          |         |          |          |         |         |         |    |    |    |   |
| $\Sigma$                                                                      | B                         | Q                                                                                                                                                                                                                                                                                                                                         | B                  | C        |          |          |          |         |          |          |         |         |         |    |    |    |   |
| Australia/Northern Territory/J - (8)                                          | AF407542                  | <table border="1"><tr><td>8</td><td></td><td></td><td></td><td></td><td></td><td></td></tr><tr><td>8</td><td></td><td></td><td></td><td></td><td></td><td></td></tr></table>                                                                                                                                                              | 8                  |          |          |          |          |         |          | 8        |         |         |         |    |    |    | 1 |
| 8                                                                             |                           |                                                                                                                                                                                                                                                                                                                                           |                    |          |          |          |          |         |          |          |         |         |         |    |    |    |   |
| 8                                                                             |                           |                                                                                                                                                                                                                                                                                                                                           |                    |          |          |          |          |         |          |          |         |         |         |    |    |    |   |
| Australia/Western Australia/ E - (8)                                          | AF407545                  | <table border="1"><tr><td>13</td><td>27</td><td>27</td><td>27</td><td></td><td></td><td></td></tr><tr><td><math>\alpha</math></td><td><math>\beta</math></td><td><math>\tau</math></td><td>M</td><td></td><td></td><td></td></tr></table>                                                                                                 | 13                 | 27       | 27       | 27       |          |         |          | $\alpha$ | $\beta$ | $\tau$  | M       |    |    |    | 1 |
| 13                                                                            | 27                        | 27                                                                                                                                                                                                                                                                                                                                        | 27                 |          |          |          |          |         |          |          |         |         |         |    |    |    |   |
| $\alpha$                                                                      | $\beta$                   | $\tau$                                                                                                                                                                                                                                                                                                                                    | M                  |          |          |          |          |         |          |          |         |         |         |    |    |    |   |
| Brazil/Minas Gerais/ B - (13, 27 <sup>3</sup> )                               | JX844209                  | <table border="1"><tr><td>72</td><td>62</td><td>61</td><td></td><td></td><td></td><td></td></tr><tr><td>C</td><td>F</td><td>N</td><td></td><td></td><td></td><td></td></tr></table>                                                                                                                                                       | 72                 | 62       | 61       |          |          |         |          | C        | F       | N       |         |    |    |    | 4 |
| 72                                                                            | 62                        | 61                                                                                                                                                                                                                                                                                                                                        |                    |          |          |          |          |         |          |          |         |         |         |    |    |    |   |
| C                                                                             | F                         | N                                                                                                                                                                                                                                                                                                                                         |                    |          |          |          |          |         |          |          |         |         |         |    |    |    |   |
| Brazil/Minas Gerais/ C - ( $\alpha$ , $\beta$ , $\tau$ , M)                   | AY283199                  | <table border="1"><tr><td>13</td><td>159</td><td>159</td><td></td><td></td><td></td><td></td></tr><tr><td>72</td><td>62</td><td>61</td><td></td><td></td><td></td><td></td></tr></table>                                                                                                                                                  | 13                 | 159      | 159      |          |          |         |          | 72       | 62      | 61      |         |    |    |    | 4 |
| 13                                                                            | 159                       | 159                                                                                                                                                                                                                                                                                                                                       |                    |          |          |          |          |         |          |          |         |         |         |    |    |    |   |
| 72                                                                            | 62                        | 61                                                                                                                                                                                                                                                                                                                                        |                    |          |          |          |          |         |          |          |         |         |         |    |    |    |   |
| Brazil/Minas Gerais/ D - (72, 62, 61)                                         | JX844216                  | <table border="1"><tr><td>72</td><td>62</td><td>61</td><td></td><td></td><td></td><td></td></tr><tr><td>C</td><td>F</td><td>N</td><td></td><td></td><td></td><td></td></tr></table>                                                                                                                                                       | 72                 | 62       | 61       |          |          |         |          | C        | F       | N       |         |    |    |    | 3 |
| 72                                                                            | 62                        | 61                                                                                                                                                                                                                                                                                                                                        |                    |          |          |          |          |         |          |          |         |         |         |    |    |    |   |
| C                                                                             | F                         | N                                                                                                                                                                                                                                                                                                                                         |                    |          |          |          |          |         |          |          |         |         |         |    |    |    |   |
| Brazil/Minas Gerais/ D - (C, F, N)                                            | AY283198                  | <table border="1"><tr><td>13</td><td>159</td><td>159</td><td></td><td></td><td></td><td></td></tr><tr><td>72</td><td>62</td><td>61</td><td></td><td></td><td></td><td></td></tr></table>                                                                                                                                                  | 13                 | 159      | 159      |          |          |         |          | 72       | 62      | 61      |         |    |    |    | 3 |
| 13                                                                            | 159                       | 159                                                                                                                                                                                                                                                                                                                                       |                    |          |          |          |          |         |          |          |         |         |         |    |    |    |   |
| 72                                                                            | 62                        | 61                                                                                                                                                                                                                                                                                                                                        |                    |          |          |          |          |         |          |          |         |         |         |    |    |    |   |
| Brazil/Minas Gerais/ E - (13, 159 <sup>2</sup> )                              | Bastos et al.2010         | <table border="1"><tr><td>78</td><td>24</td><td>24</td><td>25</td><td>31</td><td></td><td></td></tr><tr><td><math>\alpha</math></td><td><math>\beta</math></td><td><math>\beta</math></td><td>13</td><td></td><td></td><td></td></tr></table>                                                                                             | 78                 | 24       | 24       | 25       | 31       |         |          | $\alpha$ | $\beta$ | $\beta$ | 13      |    |    |    | 3 |
| 78                                                                            | 24                        | 24                                                                                                                                                                                                                                                                                                                                        | 25                 | 31       |          |          |          |         |          |          |         |         |         |    |    |    |   |
| $\alpha$                                                                      | $\beta$                   | $\beta$                                                                                                                                                                                                                                                                                                                                   | 13                 |          |          |          |          |         |          |          |         |         |         |    |    |    |   |
| Brazil/Minas Gerais/ E - (72, 62, 61)                                         | JX844210                  | <table border="1"><tr><td>78</td><td>24</td><td>24</td><td>25</td><td>31</td><td></td><td></td></tr><tr><td><math>\alpha</math></td><td><math>\beta</math></td><td><math>\beta</math></td><td>13</td><td></td><td></td><td></td></tr></table>                                                                                             | 78                 | 24       | 24       | 25       | 31       |         |          | $\alpha$ | $\beta$ | $\beta$ | 13      |    |    |    | 3 |
| 78                                                                            | 24                        | 24                                                                                                                                                                                                                                                                                                                                        | 25                 | 31       |          |          |          |         |          |          |         |         |         |    |    |    |   |
| $\alpha$                                                                      | $\beta$                   | $\beta$                                                                                                                                                                                                                                                                                                                                   | 13                 |          |          |          |          |         |          |          |         |         |         |    |    |    |   |
| Brazil/Minas Gerais/ E - (78, 24 <sup>2</sup> , 25, 31)                       | JX844206                  | <table border="1"><tr><td><math>\alpha</math></td><td><math>\beta</math></td><td><math>\beta</math></td><td>13</td><td></td><td></td><td></td></tr><tr><td><math>\alpha</math></td><td><math>\beta</math></td><td><math>\beta</math></td><td>N</td><td></td><td></td><td></td></tr></table>                                               | $\alpha$           | $\beta$  | $\beta$  | 13       |          |         |          | $\alpha$ | $\beta$ | $\beta$ | N       |    |    |    | 5 |
| $\alpha$                                                                      | $\beta$                   | $\beta$                                                                                                                                                                                                                                                                                                                                   | 13                 |          |          |          |          |         |          |          |         |         |         |    |    |    |   |
| $\alpha$                                                                      | $\beta$                   | $\beta$                                                                                                                                                                                                                                                                                                                                   | N                  |          |          |          |          |         |          |          |         |         |         |    |    |    |   |
| Brazil/Minas Gerais/ E - ( $\alpha$ , $\beta^2$ , 13)                         | JX844215                  | <table border="1"><tr><td><math>\alpha</math></td><td><math>\beta</math></td><td><math>\beta</math></td><td>N</td><td></td><td></td><td></td></tr></table>                                                                                                                                                                                | $\alpha$           | $\beta$  | $\beta$  | N        |          |         |          | 4        |         |         |         |    |    |    |   |
| $\alpha$                                                                      | $\beta$                   | $\beta$                                                                                                                                                                                                                                                                                                                                   | N                  |          |          |          |          |         |          |          |         |         |         |    |    |    |   |
| Brazil/Minas Gerais/ E - ( $\alpha$ , $\beta^2$ , N)                          | AY283200                  | <table border="1"><tr><td><math>\alpha</math></td><td><math>\beta</math></td><td><math>\beta</math></td><td>N</td><td></td><td></td><td></td></tr></table>                                                                                                                                                                                | $\alpha$           | $\beta$  | $\beta$  | N        |          |         |          | 4        |         |         |         |    |    |    |   |
| $\alpha$                                                                      | $\beta$                   | $\beta$                                                                                                                                                                                                                                                                                                                                   | N                  |          |          |          |          |         |          |          |         |         |         |    |    |    |   |



Israel/Jerusalem/ - (78, 3<sup>2</sup>)  
 Israel/Jerusalem/ - (78, 3<sup>3</sup>)  
 Israel/Or-Haner/ - (M, F<sup>2</sup>)  
 Israel/Upper Galilee/ - (7, E<sup>2</sup>, M, 3<sup>2</sup>)  
 Israel/Upper Galilee/ - (7, E<sup>4</sup>)  
 Israel/Upper Galilee/ - (M, F<sup>3</sup>)  
 Israel/Western Galilee/ - (4, 3, 4, 3)  
 Israel/Western Galilee/ - (74<sup>2</sup>, 76)  
 Israel/Western Galilee/ - (75, 73)  
 Israel/Western Galilee/ - (77, 3, 38)  
 Israel/Western Galilee/ - (77, 4, 3)  
 Israel/Western Galilee/ - (78, 25<sup>2</sup>, 15<sup>2</sup>)  
 Italy/Sicily/ C - (5,  $\Gamma^3$ )  
 Italy/Sicily/ C - (5,  $\varphi^3$ )  
 Italy/Sicily/ G - (6, 7<sup>3</sup>)  
 Italy/Sicily/ G - (M<sup>3</sup>, Q)  
 Italy/Sicily/ G - (Q, M, Q<sup>2</sup>, M)  
 Italy/Sicily/ G - (Q, N<sup>3</sup>)  
 Japan/Okinawa/ - (80, 73, 81, 73, M)  
 Mexico/ Santa Martha/ - ( $\alpha$ ,  $\beta^3$ ,  $\Gamma$ )  
 Mexico/ Tamaulipas/ - (69, 61, 70, 71, 61)  
 Mexico/Aguascalientes/ E - (4, 9, 10, 11, 9)  
 Mexico/Morelos/ E - ( $\alpha$ ,  $\beta^2$ ,  $\Gamma$ )  
 Mexico/Pichucalco/ E - ( $\alpha$ ,  $\beta$ ,  $\beta$ ,  $\Gamma^2$ )  
 Mexico/Playa Vicente/ - (T, C, B<sup>2</sup>, C, B, C)  
 Mexico/Puente de Ixtla/ G - (12, 13, 14)  
 Mexico/Tamaulipas/ - (28, 29, 104, 29, M, F)  
 Mexico/Tamaulipas/ - (4, 63<sup>2</sup>, 27, 12)  
 Mexico/Tamaulipas/ - (4, 9, 10<sup>2</sup>, 9)

Molad et al, 2009  
 EU678759  
 AY355284  
 EU678761  
 EU678760  
 AY846868  
 Molad et al, 2009  
 Molad et al, 2009  
 EU678763  
 Molad et al, 2009  
 EU678762  
 EU678764  
 AY702928  
 AY702929  
 AY702932  
 AY702926  
 AY702930  
 AY702931  
 FJ226456  
 EF053268  
 EU283852  
 DQ501243  
 AF345869  
 DQ501244  
 JN564636  
 DQ501242  
 JN564643  
 EU283850  
 EU283848

|          |           |           |           |         |          |   |  |
|----------|-----------|-----------|-----------|---------|----------|---|--|
| 78       | 3         | 3         |           |         |          |   |  |
| 78       | 3         | 3         | 3         |         |          |   |  |
| M        | F         | F         |           |         |          |   |  |
| 7        | E         | E         | M         | 3       | 3        |   |  |
| 7        | E         | E         | E         | E       |          |   |  |
| M        | F         | F         | F         |         |          |   |  |
| 4        | 3         | 4         | 3         |         |          |   |  |
| 74       | 74        | 76        |           |         |          |   |  |
| 75       | 73        |           |           |         |          |   |  |
| 77       | 3         | 38        |           |         |          |   |  |
| 77       | 4         | 3         |           |         |          |   |  |
| 78       | 25        | 25        | 15        | 15      |          |   |  |
| 5        | $\Gamma$  | $\Gamma$  | $\Gamma$  |         |          |   |  |
| 5        | $\varphi$ | $\varphi$ | $\varphi$ |         |          |   |  |
| 6        | 7         | 7         | 7         |         |          |   |  |
| M        | M         | M         | Q         |         |          |   |  |
| Q        | M         | Q         | Q         | M       |          |   |  |
| Q        | N         | N         | N         |         |          |   |  |
| 80       | 73        | 81        | 73        | M       |          |   |  |
| $\alpha$ | $\beta$   | $\beta$   | $\Gamma$  | $\beta$ |          |   |  |
| 69       | 61        | 70        | 71        | 61      |          |   |  |
| 4        | 9         | 10        | 11        | 9       |          |   |  |
| $\alpha$ | $\beta$   | $\beta$   | $\Gamma$  |         |          |   |  |
| $\alpha$ | $\beta$   | $\beta$   | $\Gamma$  | $\beta$ | $\Gamma$ |   |  |
| T        | C         | B         | B         | C       | B        | C |  |
| 12       | 13        | 14        |           |         |          |   |  |
| 28       | 29        | 104       | 29        | M       | F        |   |  |
| 4        | 63        | 63        | 27        | 12      |          |   |  |
| 4        | 9         | 10        | 10        | 9       |          |   |  |

3  
 4  
 3  
 6  
 5  
 4  
 4  
 3  
 2  
 3  
 3  
 5  
 4  
 4  
 4  
 4  
 5  
 4  
 4  
 4  
 5  
 5  
 5  
 5  
 4  
 6  
 7  
 3  
 6  
 5  
 5

Mexico/Tamaulipas/ - (56, 22, 58, 59) EU283847  
 Mexico/Tamaulipas/ - (60, 61<sup>2</sup>, 62, 61) EU283849  
 Mexico/Tamaulipas/ - (64, 65, D, 65, E) EU283853  
 Mexico/Tamaulipas/ - (67, 68, 63, 27, 12) EU283851  
 Mexico/Tamaulipas/ - (D, 65, D, 65, E) EU283854  
 Mexico/Tepic/ - ( $\alpha$ ,  $\beta^2$ ,  $\Gamma$ ) JN564639  
 Mexico/Tlapacoyan/ - (103, C, F) JN564638  
 Mexico/Tlapacoyan/ - (108,  $\beta^3$ ,  $\Gamma$ ) JN564641  
 Mexico/Tlapacoyan/ - (T, C, B<sup>2</sup>, C<sup>2</sup>) JN564644  
 Mexico/Yucatan/G - (T, C, B<sup>2</sup>, C, B,  $\pi$ ) AF345871  
 Nigeria/Zaria/ - (54, 55, F) EU106083  
 Puerto Rico/Puerto Rico/ C - (E,  $\varphi^5$ ) AY191826  
 Republic of the Philippines/Cebu/ E - (46, 88,46) JQ839006  
 Republic of the Philippines/Cebu/K-(107, M, 107, M<sup>2</sup>) JQ839007  
 Republic of the Philippines/Cebu/D - (46<sup>2</sup>) JQ839005  
 Republica of China/Taiwan/ - (106, F<sup>2</sup>, M<sup>3</sup>,F, M ) FJ188386  
 Republica of China/Taiwan/ - (M,  $\beta$ ,  $\Gamma$ ,  $\beta^5$ , ) FJ195757  
 Republica of China/Taiwan/ - ( $\alpha$ ) FJ188391  
 South Africa/EC22/G - (27, 13, 4<sup>2</sup>, 37) KC470183  
 South Africa/EC23/G - (151, 152, 4<sup>2</sup>, 153) KC470184  
 South Africa/GP\_C1/ - (82, 13, 4<sup>2</sup>, 37) KC470167  
 South Africa/GP\_C2/ - (34, 27, 3, 38, 13, 3, 38) KC470168  
 South Africa/GP\_C5/ - (3, 4<sup>3</sup>, 37) KC470169  
 South Africa/GP-C1112105/G - (34, 37) KC470170  
 South Africa/GP-C1817105/G - (34, 13<sup>2</sup>) KC470172  
 South Africa/GP-C4117/G - (3, 36, 38) KC470171  
 South Africa/GP-C7117105/ - (34, 13, 37) KC470173  
 South Africa/KZN\_14/ E- (142, 43, 25, 31) KC470179  
 South Africa/KZN\_19/ E - (141, 140<sup>2</sup>) KC470180

|          |           |           |           |           |           |         |         |  |  |
|----------|-----------|-----------|-----------|-----------|-----------|---------|---------|--|--|
| 56       | 22        | 58        | 59        |           |           |         |         |  |  |
| 60       | 61        | 61        | 62        | 61        |           |         |         |  |  |
| 64       | 65        | D         | 65        | E         |           |         |         |  |  |
| 67       | 68        | 63        | 27        | 12        |           |         |         |  |  |
| D        | 65        | D         | 65        | E         |           |         |         |  |  |
| $\alpha$ | $\beta$   | $\beta$   | $\Gamma$  |           |           |         |         |  |  |
| 103      | C         | F         |           |           |           |         |         |  |  |
| 108      | $\beta$   | $\beta$   | $\beta$   | $\Gamma$  |           |         |         |  |  |
| T        | C         | B         | B         | C         | C         |         |         |  |  |
| T        | C         | B         | B         | C         | B         | $\pi$   |         |  |  |
| 54       | 55        | F         |           |           |           |         |         |  |  |
| E        | $\varphi$ | $\varphi$ | $\varphi$ | $\varphi$ | $\varphi$ |         |         |  |  |
| 46       | 88        | 46        |           |           |           |         |         |  |  |
| 107      | M         | 107       | M         | M         |           |         |         |  |  |
| 46       | 46        |           |           |           |           |         |         |  |  |
| 106      | F         | F         | M         | M         | M         | F       | M       |  |  |
| M        | $\beta$   | $\Gamma$  | $\beta$   | $\beta$   | $\beta$   | $\beta$ | $\beta$ |  |  |
| $\alpha$ |           |           |           |           |           |         |         |  |  |
| 27       | 13        | 4         | 4         | 37        |           |         |         |  |  |
| 151      | 152       | 4         | 4         | 153       |           |         |         |  |  |
| 82       | 13        | 4         | 4         | 37        |           |         |         |  |  |
| 34       | 27        | 3         | 38        | 13        | 3         | 38      |         |  |  |
| 3        | 4         | 4         | 4         | 37        |           |         |         |  |  |
| 34       | 37        |           |           |           |           |         |         |  |  |
| 34       | 13        | 13        |           |           |           |         |         |  |  |
| 3        | 36        | 38        |           |           |           |         |         |  |  |
| 34       | 13        | 37        |           |           |           |         |         |  |  |
| 142      | 43        | 25        | 31        |           |           |         |         |  |  |
| 141      | 140       | 140       |           |           |           |         |         |  |  |

4  
5  
5  
5  
5  
4  
3  
5  
6  
7  
3  
6  
3  
5  
2  
8  
8  
1  
5  
5  
5  
7  
5  
2  
3  
3  
3  
4  
3



South Africa/Southwestern Free State/ - (27, 4<sup>3</sup>, 37)  
 South Africa/Southwestern Free State/ - (3, 13, 4<sup>2</sup>, 37)  
 South Africa/Southwestern Free State/ - (34, 13<sup>2</sup>, 37)  
 South Africa/Southwestern Free State/ - (34, 45<sup>2</sup>, 46, 37)  
 South Africa/Southwestern Free State/ - (41, 13<sup>3</sup>, 4, 37)  
 South Africa/Southwestern Free State/ - (42, 43, 25, 31)  
 South Africa/WC10/G - (154)  
 South Africa/WC11/G - (40, Q<sup>5</sup>, 37)  
 South Africa/WC12/G - (27, 13, 37)  
 South Africa/WC13/G - (M, Q, M, Q, M)  
 South Africa/WC14/G - (155, 36, 38)  
 South Africa/WC16/G - (34, 13, 4, 13<sup>2</sup>, 4, 37)  
 South Africa/WC4/ - (40, Q<sup>2</sup>, m)  
 South Africa/WC6/G - (3, 4<sup>2</sup>, 37)  
 South Africa/WC7/G - (M<sup>4</sup>)  
 Spain/Va48/ - (40, 47<sup>2</sup>, 32, C<sup>2</sup>)  
 Taiwan/Nantou/ E - ( $\alpha$ ,  $\beta^2$ ,  $\Gamma$ , 105)  
 Taiwan/Taichung/ J - ( $\alpha$ ,  $\beta^3$ ,  $\Gamma$ , 105)  
 USA/California/ G - (B<sup>2</sup>, C)  
 USA/Cushing/ G - (L, C, B, C)  
 USA/Cushing2/ G - (K, N<sup>2</sup>, F, H)  
 USA/Florida/ G - (A, B<sup>7</sup>)  
 USA/Glencoe1/ G - (K, F, N, F, H)  
 USA/Glencoe2/ G - (B, M, F, H)  
 USA/Glencoe3/ G - (T, B, C)  
 USA/Idaho/ C - (D<sup>5</sup>, E)  
 USA/Illinois/ G - (M, N, B, M, H)  
 USA/Kansas/ - (B<sup>2</sup>)  
 USA/Kansas/ - (B<sup>3</sup>)

DQ813552  
 DQ813550  
 DQ813543  
 DQ813556  
 DQ813562  
 DQ813563  
 KC470190  
 KC470191  
 KC470192  
 KC470193  
 KC470194  
 KC470196  
 KC470186  
 KC470187  
 KC470188  
 DQ811775  
 EU677384  
 FJ188389  
 AY010242  
 AY127056  
 AY127057  
 M32871  
 AY127053  
 AY127054  
 AY127055  
 M32868  
 AF345867  
 Palmer et al, 2004  
 Palmer et al. 2004

|          |         |         |          |          |     |    |   |  |  |
|----------|---------|---------|----------|----------|-----|----|---|--|--|
| 27       | 4       | 4       | 4        | 37       |     |    |   |  |  |
| 3        | 13      | 4       | 4        | 37       |     |    |   |  |  |
| 34       | 13      | 13      | 37       |          |     |    |   |  |  |
| 34       | 45      | 45      | 46       | 37       |     |    |   |  |  |
| 41       | 13      | 13      | 13       | 4        | 37  |    |   |  |  |
| 42       | 43      | 25      | 31       |          |     |    |   |  |  |
| 154      |         |         |          |          |     |    |   |  |  |
| 40       | Q       | Q       | Q        | Q        | Q   | 37 |   |  |  |
| 27       | 13      | 37      |          |          |     |    |   |  |  |
| M        | Q       | M       | Q        | M        |     |    |   |  |  |
| 155      | 36      | 38      |          |          |     |    |   |  |  |
| 34       | 13      | 4       | 13       | 13       | 4   | 37 |   |  |  |
| 40       | Q       | Q       | m        |          |     |    |   |  |  |
| 3        | 4       | 4       | 37       |          |     |    |   |  |  |
| M        | M       | M       | M        |          |     |    |   |  |  |
| 40       | 47      | 47      | 32       | C        | C   |    |   |  |  |
| $\alpha$ | $\beta$ | $\beta$ | $\Gamma$ | 105      |     |    |   |  |  |
| $\alpha$ | $\beta$ | $\beta$ | $\beta$  | $\Gamma$ | 105 |    |   |  |  |
| B        | B       | C       |          |          |     |    |   |  |  |
| L        | C       | B       | C        |          |     |    |   |  |  |
| K        | N       | N       | F        | H        |     |    |   |  |  |
| A        | B       | B       | B        | B        | B   | B  | B |  |  |
| K        | F       | N       | F        | H        |     |    |   |  |  |
| B        | M       | F       | H        |          |     |    |   |  |  |
| T        | B       | C       |          |          |     |    |   |  |  |
| D        | D       | D       | D        | D        | E   |    |   |  |  |
| M        | N       | B       | M        | H        |     |    |   |  |  |
| B        | B       |         |          |          |     |    |   |  |  |
| B        | B       | B       |          |          |     |    |   |  |  |

5  
 5  
 4  
 5  
 6  
 4  
 1  
 7  
 3  
 6  
 3  
 7  
 4  
 4  
 4  
 6  
 5  
 6  
 3  
 4  
 5  
 8  
 5  
 4  
 3  
 6  
 5  
 2  
 3



Venezuela/Lara/ - (117, 118<sup>2</sup>, 119, 120)  
 Venezuela/Lara/ - (121, 122, 123, 124, 125)  
 Venezuela/Lara/ - (126, 127, 128)  
 Venezuela/Lara/ - (129, 130, 131,  $\varphi$ , 57)  
 Venezuela/Lara/ - (13, 111, 112, 113)  
 Venezuela/Lara/ - (13, 18<sup>2</sup>, 13)  
 Venezuela/Lara/ - (136, 137, 138, 139, 95<sup>2</sup>)  
 Venezuela/Lara/ - (60, 62, 61, 62, 61, 62, 61)  
 Venezuela/Lara/ - (60, 62<sup>2</sup>, 61)  
 Venezuela/Lara/ - (64, 96, 97, 99)  
 Venezuela/Lara/ - (64, 98, F<sup>3</sup>)  
 Venezuela/Lara/ - (84, 62<sup>2</sup>, 61)  
 Venezuela/Lara/ - (85, 86, 61, 66)  
 Venezuela/Lara/ - (E,  $\varphi^3$ ,  $\beta$ , 100)  
 Venezuela/Lara/ - (T, B<sup>3</sup>)  
 Venezuela/Lara/ - (T, M)  
 Venezuela/Lara/ - (T,  $\beta^3$ , 116)  
 Venezuela/Lara/ - ( $\alpha$ ,  $\beta$ , 114, 115,  $\Gamma$ )  
 Venezuela/Merida/ - (13, 63<sup>2</sup>, 27, 63<sup>3</sup>, 27)  
 Venezuela/Merida/ - (T, B, 90, C, 91)  
 Venezuela/Merida/ - (T, B, C, F, 89)  
 Venezuela/Tachira/ - (37, 87, 92, 15)  
 Venezuela/Yaracuy/ - (132, 133, 134, 135<sup>2</sup>)  
 Venezuela/Yaracuy/ - (64, 65, D, E)  
 Venezuela/Yaracuy/ - (93, 10, 94, 109, 110)

JF957796  
 JF957787  
 JF957798  
 JF957792  
 JF957797  
 JF957805  
 JF957810  
 JF957807  
 JF957808  
 JF957809  
 JF957806  
 JF957793  
 JF957790  
 JF957803  
 JF957788  
 JF957800  
 JF957789  
 JF957791  
 JF957802  
 JF957804  
 JF957814  
 JF957794  
 JF957812  
 JF957811  
 JF957799

|          |           |           |           |          |     |    |    |  |  |  |
|----------|-----------|-----------|-----------|----------|-----|----|----|--|--|--|
| 117      | 118       | 118       | 119       | 120      |     |    |    |  |  |  |
| 121      | 122       | 123       | 124       | 125      |     |    |    |  |  |  |
| 126      | 127       | 128       |           |          |     |    |    |  |  |  |
| 129      | 130       | 131       | $\varphi$ | 57       |     |    |    |  |  |  |
| 13       | 111       | 112       | 113       |          |     |    |    |  |  |  |
| 13       | 18        | 18        | 13        |          |     |    |    |  |  |  |
| 136      | 137       | 138       | 139       | 95       | 95  |    |    |  |  |  |
| 60       | 62        | 61        | 62        | 61       | 62  | 61 |    |  |  |  |
| 60       | 62        | 62        | 61        |          |     |    |    |  |  |  |
| 64       | 96        | 97        | 99        |          |     |    |    |  |  |  |
| 64       | 98        | F         | F         | F        |     |    |    |  |  |  |
| 84       | 62        | 62        | 61        |          |     |    |    |  |  |  |
| 85       | 86        | 61        | 66        |          |     |    |    |  |  |  |
| E        | $\varphi$ | $\varphi$ | $\varphi$ | $\beta$  | 100 |    |    |  |  |  |
| T        | B         | B         | B         |          |     |    |    |  |  |  |
| T        | M         |           |           |          |     |    |    |  |  |  |
| T        | $\beta$   | $\beta$   | $\beta$   | 116      |     |    |    |  |  |  |
| $\alpha$ | $\beta$   | 114       | 115       | $\Gamma$ |     |    |    |  |  |  |
| 13       | 63        | 63        | 27        | 63       | 63  | 63 | 27 |  |  |  |
| T        | B         | 90        | C         | 91       |     |    |    |  |  |  |
| T        | B         | C         | F         | 89       |     |    |    |  |  |  |
| 37       | 87        | 92        | 15        |          |     |    |    |  |  |  |
| 132      | 133       | 134       | 135       | 135      |     |    |    |  |  |  |
| 64       | 65        | D         | E         |          |     |    |    |  |  |  |
| 93       | 10        | 94        | 109       | 110      |     |    |    |  |  |  |

5  
 5  
 3  
 5  
 4  
 4  
 6  
 7  
 4  
 4  
 5  
 4  
 4  
 6  
 4  
 2  
 5  
 5  
 8  
 5  
 5  
 4  
 5  
 4  
 5
